# Supplementary material
Source: MDPI journal article supplement (https://www.mdpi.com/2073-4433/10/2/53)
Supplement: s1 [file s1]

# Supplementary Material: Robust Nocturnal and Early Morning Rainfall Peaks over Continental East Asia in a Global Multiscale Modeling Framework

Yi Zhang <sup>1,\*</sup>, Haoming Chen <sup>1</sup> and Dan Wang <sup>2</sup>

<sup>1</sup> State Key Laboratory of Severe Weather (LaSW), Chinese Academy of Meteorological Sciences, China Meteorological Administration, 100081, Beijing, China; chenhm@cma.cn (H.C.)

<sup>2</sup> Numerical Weather Prediction Center, National Meteorological Center, China Meteorological Administration, 100081, Beijing, China; wangd@cma.cn (D.W.)

\* Correspondence: yizhang@cma.cn

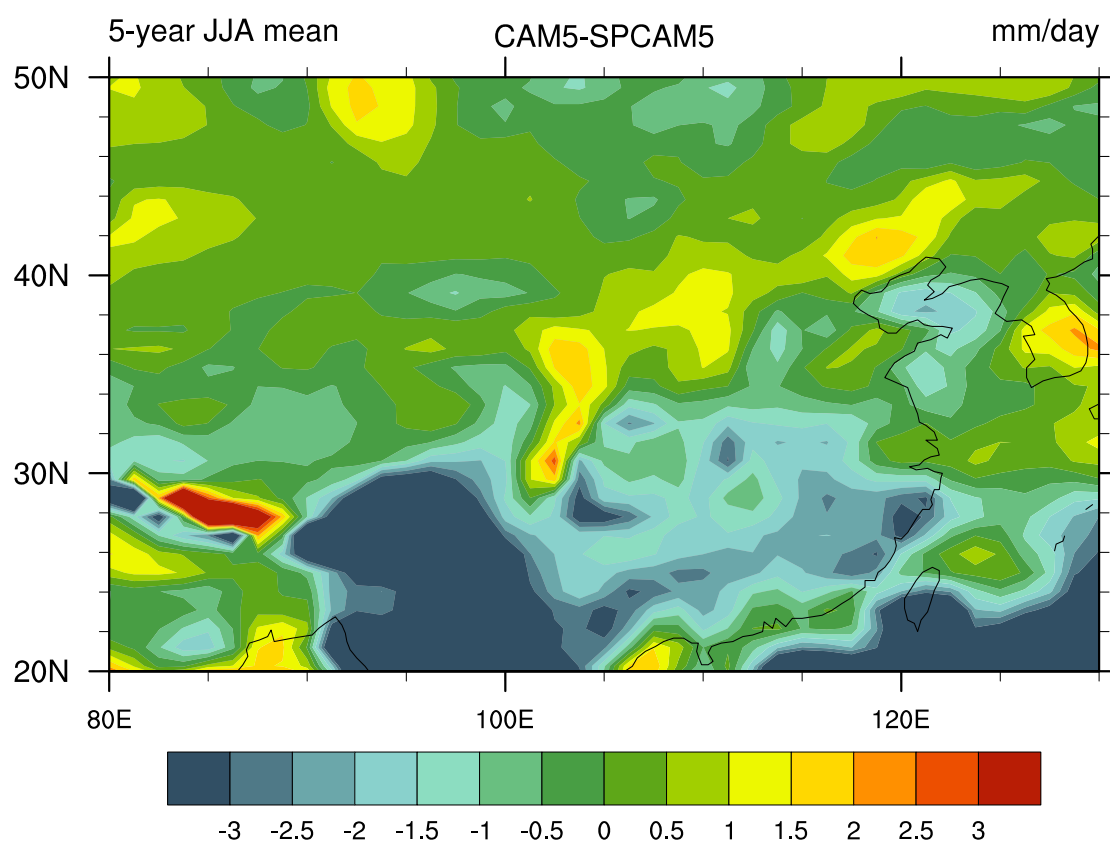

**Figure S1.** The difference of five-year mean precipitation rates (unit: mm.day-1) in June–July–August (JJA) months between CAM5 and SPCAM5 (CAM5 minus SPCAM5) over continental East Asia.

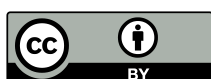

© 2018 by the authors. Submitted for possible open access publication under the terms and conditions of the Creative Commons Attribution (CC BY) license (<http://creativecommons.org/licenses/by/4.0/>).
